# Supplementary material for: Hyperspectral reflectance dataset of pristine, weathered, and biofouled plastics
Source: Copernicus journal article supplement (doi:10.5194/essd-15-745-2023), 2023-02-13
Supplement: Supplementary file 1 [file essd-15-745-2023-supplement.pdf]

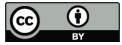

*Supplement of*

## **Hyperspectral reflectance dataset of pristine, weathered, and biofouled plastics**

**Giulia Leone et al.**

*Correspondence to:* Giulia Leone ([giulia.leone@ugent.be](mailto:giulia.leone@ugent.be))

The copyright of individual parts of the supplement might differ from the article licence.

**Table S1.** Overview of the plastic specimens analyzed in the current work. Polymer type refers to the available information from the supplier or product, unless stated otherwise. Selected polymer types were confirmed by uFTIR. Pictures in this table are taken by Giulia Leone and Mattias Bossaer.

| Type                | Plastic specimen | Condition of the assessment | Picture                                                                             | Polymer type                                 | Available measurements (d: dry, w: wet, s: submerged) | Dimensions (cm) |
|---------------------|------------------|-----------------------------|-------------------------------------------------------------------------------------|----------------------------------------------|-------------------------------------------------------|-----------------|
| Commercial plastics | Sheet            | Dry                         |    | PE<br>(confirmed by $\mu$ FTIR)              | d, w, s                                               | 6 x 6           |
|                     | Sheet            | Dry                         |   | PP<br>(confirmed by $\mu$ FTIR)              | d, w, s                                               | 6 x 6           |
|                     | Sheet            | Dry                         |  | PET amorphous<br>(confirmed by $\mu$ FTIR)   | d, w, s                                               | 6 x 6           |
|                     | Sheet            | Dry                         |  | PET crystalline<br>(confirmed by $\mu$ FTIR) | d, w, s                                               | 6 x 6           |
|                     | Sheet            | Dry                         |  | PS<br>(confirmed by $\mu$ FTIR)              | d, w, s                                               | 6 x 6           |

|                               |       |     |                                                                                     |                                                   |   |        |
|-------------------------------|-------|-----|-------------------------------------------------------------------------------------|---------------------------------------------------|---|--------|
| Weathered plastics from shops | Sheet | Dry |    | PVC<br>(Thermoplastic elastomer under $\mu$ FTIR) | d | 2 x 4  |
|                               | Sheet | Dry |    | PP<br>(confirmed by $\mu$ FTIR)                   | d | 2 x 4  |
|                               | Sheet | Dry |    | PS<br>(confirmed by $\mu$ FTIR)                   | d | 2 x 4  |
| Biofilm plastics from shops   | Sheet | Dry |  | PVC<br>(Thermoplastic elastomer under $\mu$ FTIR) | d | 2 x 10 |
|                               | Sheet | Dry |  | PP<br>(confirmed by $\mu$ FTIR)                   | d | 2 x 10 |
|                               | Sheet | Dry |  | PS<br>(confirmed by $\mu$ FTIR)                   | d | 2 x 10 |

|                             |          |                                                                                     |                                                                                     |                                                   |         |        |
|-----------------------------|----------|-------------------------------------------------------------------------------------|-------------------------------------------------------------------------------------|---------------------------------------------------|---------|--------|
| Plastic from shops          | Sheet    | Dry                                                                                 | ND                                                                                  | PVC<br>(Thermoplastic elastomer under $\mu$ FTIR) | d       | 2 x 10 |
|                             | Sheet    | Dry                                                                                 | ND                                                                                  | PP<br>(confirmed by $\mu$ FTIR)                   | d       | 2 x 10 |
|                             | Sheet    | Dry                                                                                 | ND                                                                                  | PS<br>(confirmed by $\mu$ FTIR)                   | d       | 2 x 10 |
|                             | Spar bag | Dry                                                                                 |   | LDPE<br>(paraffin under $\mu$ FTIR)               | d       | ND     |
| Jumbo bag                   | Dry      |  | ND                                                                                  | d                                                 | ND      |        |
| Bottle                      | Dry      |  | ND                                                                                  | d                                                 | ND      |        |
| Biofilm commercial plastics | Sheet    | Wet rough                                                                           |  | PP<br>(confirmed by $\mu$ FTIR)                   | d, w, s | 6 x 6  |

|       |            |                                                                                     |                                               |   |         |       |
|-------|------------|-------------------------------------------------------------------------------------|-----------------------------------------------|---|---------|-------|
| Sheet | Wet smooth |    | PP<br>(confirmed by $\mu$ FTIR)               | s | d, w,   | 6 x 6 |
| Sheet | Wet rough  |    | PE<br>(confirmed by $\mu$ FTIR)               |   | d, w, s | 6 x 6 |
| Sheet | Wet smooth |    | PE<br>(confirmed by $\mu$ FTIR)               |   | d, w, s | 6 x 6 |
| Sheet | Wet rough  |   | PS<br>(confirmed by $\mu$ FTIR)               |   | d, w, s | 6 x 6 |
| Sheet | Wet smooth |  | PS<br>(confirmed by $\mu$ FTIR)               |   | d, w, s | 6 x 6 |
| Sheet | Wet rough  |  | PET<br>Amorphous<br>(confirmed by $\mu$ FTIR) |   | d, w, s | 6 x 6 |
| Sheet | Wet smooth |  | PET amorphous<br>(confirmed by $\mu$ FTIR)    |   | d, w, s | 6 x 6 |

|       |            |                                                                                     |                                                 |         |       |
|-------|------------|-------------------------------------------------------------------------------------|-------------------------------------------------|---------|-------|
| Sheet | Wet rough  |    | PET<br>Crystalline<br>(confirmed by $\mu$ FTIR) | d, w, s | 6 x 6 |
| Sheet | Wet smooth |    | PET crystalline<br>(confirmed by $\mu$ FTIR)    | d, w, s | 6 x 6 |
| Sheet | Dry rough  |    | PS<br>(confirmed by $\mu$ FTIR)                 | d       | 6 x 6 |
| Sheet | Dry smooth |   | PS<br>(confirmed by $\mu$ FTIR)                 | d       | 6 x 6 |
| Sheet | Dry rough  |  | PE<br>(confirmed by $\mu$ FTIR)                 | d       | 6 x 6 |
| Sheet | Dry smooth |  | PE<br>(confirmed by $\mu$ FTIR)                 | d       | 6 x 6 |
| Sheet | Dry rough  |  | PET amorphous<br>(confirmed by $\mu$ FTIR)      | d       | 6 x 6 |
| Sheet | Dry smooth |  | PET amorphous<br>(confirmed by $\mu$ FTIR)      | d       | 6 x 6 |

|       |            |                                                                                   |                                              |   |       |
|-------|------------|-----------------------------------------------------------------------------------|----------------------------------------------|---|-------|
| Sheet | Dry rough  | 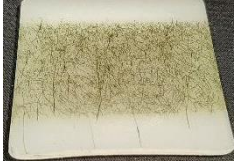 | PP<br>(confirmed by $\mu$ FTIR)              | d | 6 x 6 |
| Sheet | Dry smooth |  | PP<br>(confirmed by $\mu$ FTIR)              | d | 6 x 6 |
| Sheet | Dry rough  |  | PET crystalline<br>(confirmed by $\mu$ FTIR) | d | 6x6   |
| Sheet | Dry smooth |  | PET crystalline<br>(confirmed by $\mu$ FTIR) | d | 6x6   |

---

|                        |       |          |                                                                                     |                                 |         |       |
|------------------------|-------|----------|-------------------------------------------------------------------------------------|---------------------------------|---------|-------|
| Artificially weathered | Sheet | Dry      |  | PS<br>(confirmed by $\mu$ FTIR) | d, w, s | 2 x 4 |
|                        | Sheet | Seawater |  | PS<br>(confirmed by $\mu$ FTIR) | d, w, s | 2 x 4 |
|                        | Sheet | Dry      |  | PE<br>(confirmed by $\mu$ FTIR) | d, w, s | 2 x 4 |
|                        | Sheet | Seawater |  | PE<br>(confirmed by $\mu$ FTIR) | d, w, s | 2 x 4 |

|       |          |                                                                                     |                                              |         |       |
|-------|----------|-------------------------------------------------------------------------------------|----------------------------------------------|---------|-------|
| Sheet | Dry      |    | PP<br>(confirmed by $\mu$ FTIR)              | d, w, s | 2 x 4 |
| Sheet | Seawater |    | PP<br>(confirmed by $\mu$ FTIR)              | d, w, s | 2 x 4 |
| Sheet | Dry      |    | PET amorphous<br>(confirmed by $\mu$ FTIR)   | d, w, s | 2 x 4 |
| Sheet | Seawater |    | PET amorphous<br>(confirmed by $\mu$ FTIR)   | d, w, s | 2 x 4 |
| Sheet | Dry      |  | PET crystalline<br>(confirmed by $\mu$ FTIR) | d, w, s | 2 x 4 |
| Sheet | Seawater |  | PET crystalline<br>(confirmed by $\mu$ FTIR) | d, w, s | 2 x 4 |

---

|              |            |      |                                                                                     |                                 |         |    |
|--------------|------------|------|-------------------------------------------------------------------------------------|---------------------------------|---------|----|
| Real samples | Green Buoy | Real |  | PP<br>(confirmed by $\mu$ FTIR) | d, w, s | ND |
|--------------|------------|------|-------------------------------------------------------------------------------------|---------------------------------|---------|----|



Milk bottle      Real

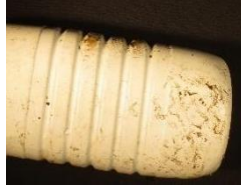

HDPE  
(confirmed by  
 $\mu$ FTIR)

d, w, s

ND

Foam      Real

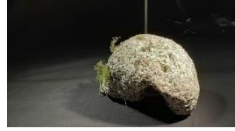

PS

d

ND

Toy  
placemat      Real

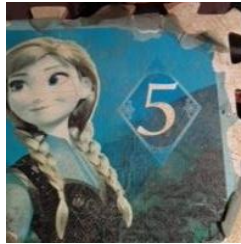

PP – PE  
(confirmed by  
 $\mu$ FTIR)

d, w, s

ND

Green  
Bottle      Real

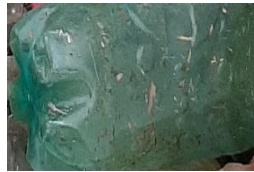

PET  
(confirmed by  
 $\mu$ FTIR)

d, w, s

ND

Yellow  
sheet      Real

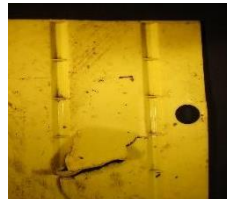

HDPE  
(confirmed by  
 $\mu$ FTIR)

d

ND

Bag dog  
food      Real

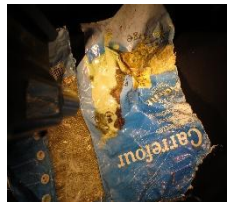

PE  
(confirmed by  
 $\mu$ FTIR)

d

ND

Rope      Real

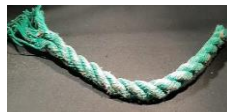

PP  
(confirmed by  
 $\mu$ FTIR)

d

ND

|                           |             |          |                                                                                     |                                           |   |       |
|---------------------------|-------------|----------|-------------------------------------------------------------------------------------|-------------------------------------------|---|-------|
|                           | Shoe        | Real     |    | Fluorocarbon<br>(confirmed by $\mu$ FTIR) | d | ND    |
|                           | Bubble wrap | Real     |    | PE<br>(confirmed by $\mu$ FTIR)           | d | ND    |
|                           | Foam        | Real     |    | PE<br>(confirmed by $\mu$ FTIR)           | d | ND    |
|                           | Red sheet   | Real     |   | PP<br>(confirmed by $\mu$ FTIR)           | d | ND    |
|                           | Cup         | Real     |  | PP<br>(confirmed by $\mu$ FTIR)           | d | ND    |
| The Ocean Cleanup samples | HDPE        | Pristine |  | PE                                        | d | 30x30 |
|                           | Extruded PS | Pristine |  | Extruded PS                               | d | 30x30 |

|      |          |                                                                                     |     |   |       |
|------|----------|-------------------------------------------------------------------------------------|-----|---|-------|
| PP   | Pristine |    | PP  | d | 30x30 |
| PET  | Pristine |    | PET | d | 30x30 |
| PVC  | Pristine |    | PVC | d | 30x30 |
| PA6  | Pristine |   | PA6 | d | 30x30 |
| Wood | Real     |  | NA  | d | NA    |

---

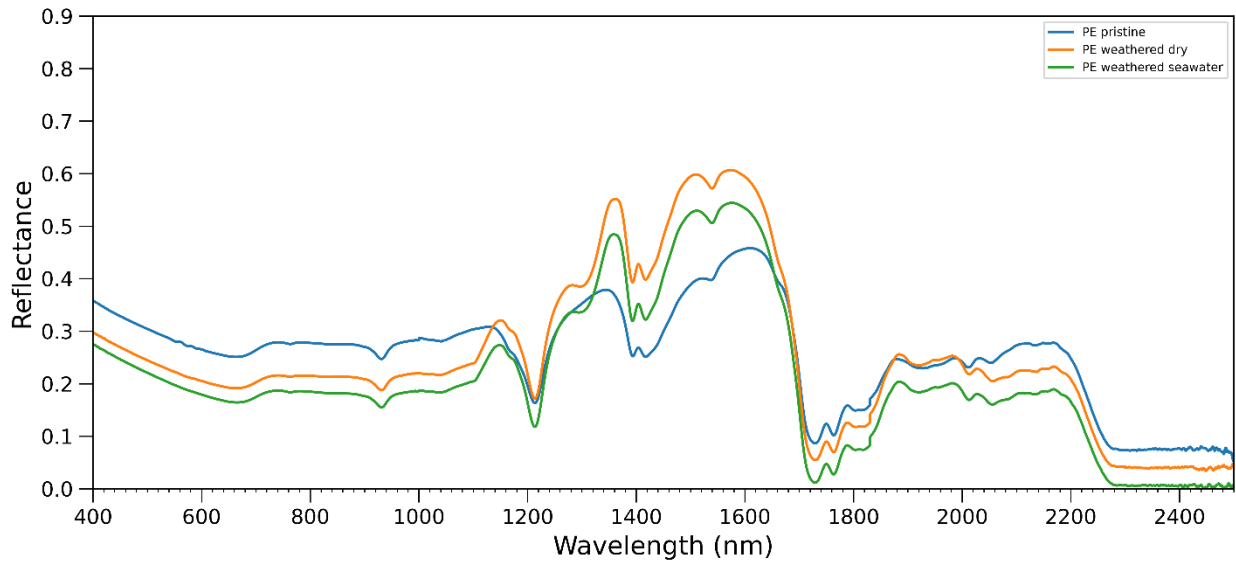

**Figure S1.** Spectral reflectance of virgin, dry weathered and seawater weathered polyethylene (PE). The spectrum of the virgin sample shows clear absorption features in the SWIR and is relatively flat in the VNIR. Weathering changes the absolute reflectance of the sample.

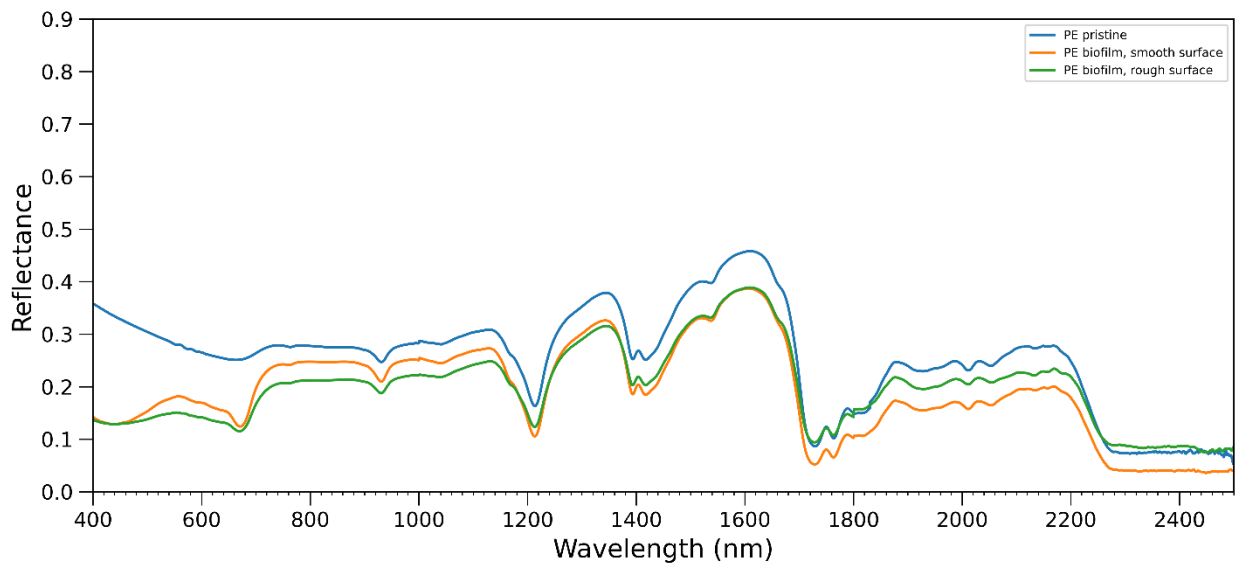

**Figure S2.** Spectral reflectance of dry biofouled with smooth and rough surface and pristine polyethylene (PE). The impact of biofouling is very clear in the VIS part of the spectrum, resulting in a different spectral shape with peak in the green. After 700nm, we observe a consistent, slight decrease in reflectance for the dry biofilm. For the wet biofilm, we observe a very strong decrease in reflectance and change of the shape of the spectrum.
